# Supplementary material for: Melting point–solubility–structure correlations in chiral and racemic model cocrystals
Source: Royal Society of Chemistry journal article supplement (doi:10.1039/d0ce00014k), 2020-01-01
Supplement: d0ce00014k1.pdf [file d0ce00014k1.pdf]

# Melting point–solubility–structure correlations in chiral and racemic model cocrystals

**Ornella E. Y. Kilinkissa<sup>a</sup>, Krishna K. Govender<sup>b,c</sup> and Nikoletta B. Báthori<sup>\*a</sup>**

<sup>a</sup> Department of Chemistry, Cape Peninsula University of Technology, P. O. Box 652, Cape Town, South Africa,  
8000. E-mail: [bathorin@cput.ac.za](mailto:bathorin@cput.ac.za), Fax: +27 21 460 3854, Tel: +27 21 460 8354

<sup>b</sup> Department of Chemical Sciences, University of Johannesburg, P. O. Box 17011, Doornfontein Campus, 2028,  
Johannesburg, South Africa.

<sup>c</sup> Council for Scientific and Industrial Research, National Integrated Cyber Infrastructure, Centre for High  
Performance Computing, 15 Lower Hope Road, Rosebank, Cape Town, 7700, South Africa.

ORCID: Nikoletta B. Báthori: 0000-0002-2505-7826. Krishna K. Govender: 0000-0002-9058-1675

## Table of Contents

|                                                                    |    |
|--------------------------------------------------------------------|----|
| 1. Cocrystal formation.....                                        | 2  |
| 2. X-ray crystallography .....                                     | 2  |
| 3. Thermal analysis of cocrystals .....                            | 5  |
| 4. Powder X-ray analysis .....                                     | 10 |
| 5. Energy calculations and energy frameworks .....                 | 13 |
| 6. Hirshfeld surface analysis (additional fingerprint plots) ..... | 15 |
| 7. Solubility measurements results.....                            | 16 |
| 8. References .....                                                | 20 |

## 1. Cocrystal formation

All chemicals were purchased from Sigma Aldrich and were used without further purification. **BIPY•PTA** cocrystals were prepared by mixing a 1:1 stoichiometric amount of 4,4'-bipyridine hydrate, BIPY.H<sub>2</sub>O (66 mg, 0.38 mmol) and *p*-toluic acid, PTA (51 mg, 0.38 mmol) and dissolving them in a minimum amount of dimethyl sulfoxide (DMSO) until the solution became clear and left to evaporate at room temperature. Colourless block shape crystals were obtained after few weeks (Mp = 158.9-161.2 °C). Cocrystals of **BIPY•racPBA** were prepared by dissolving 63 mg (0.36 mol) of BIPY.H<sub>2</sub>O and 60 mg (0.37 mol) of *rac*-2-phenylbutyric acid (*rac*PBA) in 3 ml methanol. The solution was stirred until it became clear and left to crystallise at room temperature. Block shape colourless crystals were obtained after two weeks (Mp = 80.5-84.0 °C). The cocrystal **BIPY•racPSA** was prepared by dissolving 125 mg (0.72 mol) of BIPY.H<sub>2</sub>O and 140 mg (0.72 mol) of racemic phenylsuccinic acid (*rac*PSA) in 2.8 ml of isopropanol until the solution became clear, and was left to crystallise at room temperature. Block shape yellow crystals were obtained after 1 week (Mp = 148.4-150.4 °C). 79 mg (0.43 mmol) of the 1,2-bis(4-pyridyl)ethane (ETBIPY) and 84 mg (0.43 mmol) of (*rac*)PSA were dissolved in 1:1 mixture of propanol/water. Colourless crystals of **ETBIPY•racPSA** were obtained within a few days via a slow evaporation method (Mp = 185.8-187.9 °C). ETBIPY (74 mg, 0.40 mmol) and (*S*)-PSA (78 mg, 0.40 mmol) were dissolved in a minimal amount of DMSO. The solution was allowed to slowly evaporate at room temperature to yield colourless block crystals of **ETBIPY•(S)PSA** after four weeks (Mp = 147.4-151.4 °C). Considerable effort was invested to prepare BIPY•(*S*)PBA and BIPY•(*S*)PSA but without success.

## 2. X-ray crystallography

Intensity data for all the structures were collected on a Bruker DUO APEX II<sup>1</sup> diffractometer with graphite-monochromated MoK $\alpha$  radiation ( $\lambda$  = 0.71073 Å) at 173K using an Oxford Cryostream 700. Data collection and cell refinement were performed using SAINT-Plus<sup>2</sup> and the space groups were determined from systematic absences using XPREP<sup>3</sup> and further justified by the refinement results. Accurate unit cell parameters were refined on all data. The structures were solved using SHELXS-97<sup>4</sup> and refined using full-matrix least squares methods in SHELXL-2016/4<sup>4</sup> within the X-Seed<sup>5</sup> graphical user interface. Non-hydrogen atoms were refined anisotropically. The hydrogen atoms bound to carbon atoms were placed at idealized positions and refined as riding atoms. Hydroxyl hydrogen atoms were located in the difference electron density map and were constrained into idealized positions with suitable AFIX instruction. Crystal data and hydrogen bond details are given in Table S1 and Table S2, respectively. CCDC deposit numbers 1912005-1912009 contains the supplementary crystallographic data for this paper. These data can be obtained free of charge from the Cambridge Crystallographic Data Centre via [www.ccdc.cam.ac.uk/data\\_request/cif](http://www.ccdc.cam.ac.uk/data_request/cif).

Table S 1 Crystal data for discussed compounds

| Compounds                                   | BIPY•PTA                                                      | BIPY•racPBA                                        | BIPY•racPSA                                                   | ETBIPY•racPSA                                                 | ETBIPY•(S)PSA                                                 |
|---------------------------------------------|---------------------------------------------------------------|----------------------------------------------------|---------------------------------------------------------------|---------------------------------------------------------------|---------------------------------------------------------------|
| <b>Molecular formula</b>                    | C <sub>26</sub> H <sub>24</sub> N <sub>2</sub> O <sub>4</sub> | C <sub>15</sub> H <sub>16</sub> NO <sub>2</sub>    | C <sub>20</sub> H <sub>18</sub> N <sub>2</sub> O <sub>4</sub> | C <sub>22</sub> H <sub>22</sub> N <sub>2</sub> O <sub>4</sub> | C <sub>22</sub> H <sub>22</sub> N <sub>2</sub> O <sub>4</sub> |
| <b>Formula weight (g.mol<sup>-1</sup>)</b>  | 428.47                                                        | 242.29                                             | 350.36                                                        | 378.41                                                        | 378.42                                                        |
| <b>Crystal system</b>                       | monoclinic                                                    | monoclinic                                         | monoclinic                                                    | triclinic                                                     | triclinic                                                     |
| <b>Space group</b>                          | <i>P</i> 2 <sub>1</sub> / <i>c</i> (No.14)                    | <i>P</i> 2 <sub>1</sub> / <i>c</i> (No.14)         | <i>P</i> 2 <sub>1</sub> / <i>n</i> (No.14)                    | <i>P</i> 1̄ (No. 2)                                           | <i>P</i> 1 (No. 1)                                            |
| <b>a(Å)</b>                                 | 7.8077(16)                                                    | 5.695(11)                                          | 9.3729(19)                                                    | 6.5593(13)                                                    | 6.5705(13)                                                    |
| <b>b(Å)</b>                                 | 6.1034(12)                                                    | 32.968(7)                                          | 18.545(4)                                                     | 9.2837(19)                                                    | 9.2493(18)                                                    |
| <b>c(Å)</b>                                 | 22.881(5)                                                     | 7.2241(14)                                         | 11.135(2)                                                     | 16.826(3)                                                     | 17.129(3)                                                     |
| <b>α(°)</b>                                 | 90.00                                                         | 90.00                                              | 90.00                                                         | 82.39(3)                                                      | 92.82(3)                                                      |
| <b>β(°)</b>                                 | 91.67(3)                                                      | 109.74(3)                                          | 113.89(3)                                                     | 81.52(3)                                                      | 99.52(3)                                                      |
| <b>γ(°)</b>                                 | 90.00                                                         | 90.00                                              | 90.00                                                         | 69.63(3)                                                      | 110.25(3)                                                     |
| <b>V(Å<sup>3</sup>)</b>                     | 1089.9(4)                                                     | 1276.7(5)                                          | 1769.8(7)                                                     | 946.4(3)                                                      | 956.8(4)                                                      |
| <b>Z</b>                                    | 2                                                             | 4                                                  | 4                                                             | 2                                                             | 2                                                             |
| <b>ρ<sub>calc</sub> (g.cm<sup>-3</sup>)</b> | 1.306                                                         | 1.260                                              | 1.315                                                         | 1.328                                                         | 1.314                                                         |
| <b>μ(MoKα) (mm<sup>-1</sup>)</b>            | 0.089                                                         | 0.084                                              | 0.093                                                         | 0.092                                                         | 0.091                                                         |
| <b>F(000)</b>                               | 452                                                           | 516                                                | 736                                                           | 400                                                           | 400                                                           |
| <b>Crystal size (mm)</b>                    | 0.14×0.18×0.33                                                | 0.10×0.15×0.15                                     | 0.18×0.23×0.32                                                | 0.09 × 0.12 × 0.24                                            | 0.10× 0.37× 0.40                                              |
| <b>Temperature (K)</b>                      | 173(2)                                                        | 173(2)                                             | 173(2)                                                        | 173(2)                                                        | 173(2)                                                        |
| <b>Radiation (Å)</b>                        | MoKα, 0.71073                                                 | MoKα, 0.71073                                      | MoKα, 0.71073                                                 | MoKα, 0.71073                                                 | MoKα, 0.71073                                                 |
| <b>Theta min-max (°)</b>                    | 2.61, 28.29                                                   | 2.47, 28.25                                        | 2.20, 28.37                                                   | 2.35, 27.33                                                   | 1.21, 28.29                                                   |
| <b>Dataset</b>                              | -8:10; -6:8; -30:18                                           | -7:7; -43:43; 9:9                                  | -12:12; -24:24; -6:14                                         | -8: 8; -11: 11; 0: 21                                         | -8: 8; -12:12; -22: 22                                        |
| <b>Final R indices</b>                      | R <sub>1</sub> =0.0470,<br>wR <sub>2</sub> =0.1188            | R <sub>1</sub> =0.0626,<br>wR <sub>2</sub> =0.1317 | R <sub>1</sub> =0.0415,<br>wR <sub>2</sub> =0.1024            | R <sub>1</sub> =0.0777,<br>wR <sub>2</sub> =0.1634            | R <sub>1</sub> =0.0489,<br>wR <sub>2</sub> =0.0969            |
| <b>R indices (all data)</b>                 | R <sub>1</sub> =0.0710,<br>wR <sub>2</sub> =0.1330            | R <sub>1</sub> =0.0777,<br>wR <sub>2</sub> =0.1379 | R <sub>1</sub> =0.0581,<br>wR <sub>2</sub> =0.1115            | R <sub>1</sub> =0.1195,<br>wR <sub>2</sub> =0.1803            | R <sub>1</sub> =0.0398,<br>wR <sub>2</sub> =0.0918            |
| <b>Tot., uniq.data, R(int)</b>              | 5002, 1910, 0.0235                                            | 10554, 2470, 0.0297                                | 12630, 3351, 0.0299                                           | 4116, 2860, 0.0494                                            | 9350, 8032, 0.0435                                            |
| <b>N<sub>refs</sub> N<sub>par</sub></b>     | 2697, 144                                                     | 3116, 165                                          | 3351, 237                                                     | 2680, 255                                                     | 8032, 509                                                     |
| <b>S</b>                                    | 1.038                                                         | 1.084                                              | 1.040                                                         | 1.060                                                         | 1.038                                                         |
| <b>Max. and av. Shift/error</b>             | 0.00, 0.00                                                    | 0.00, 0.00                                         | 0.000, 0.000                                                  | 0.00, 0.00                                                    | 0.00, 0.00                                                    |
| <b>Min. and max. resd. Dens.</b>            | -0.223, 0.309                                                 | -0.223, 0.490                                      | -0.189, 0.261                                                 | -0.299, 0.322                                                 | -0.191, 0.235                                                 |

Table S 2 Hydrogen bonding metrics for discussed compounds

| Compounds            | d(D-H) (Å) | d(H...A) (Å) | d(D...A) (Å) | D-H...A (°) | Symmetry operator     |
|----------------------|------------|--------------|--------------|-------------|-----------------------|
| <b>BIPY•PTA</b>      |            |              |              |             |                       |
| O3-H3...N1           | 0.84       | 1.84         | 2.6748(2)    | 178.0       |                       |
| C1-H1...O2*          | 0.95       | 2.35         | 3.241(2)     | 156.9       | x, y+1, z             |
| <b>BIPY•racPBA</b>   |            |              |              |             |                       |
| O3-H3...N1           | 0.84       | 1.80         | 2.618(2)     | 165.6       |                       |
| C4-H4...O2*          | 0.95       | 2.63         | 3.276(2)     | 126.1       | -x+1, -y, -z          |
| C5-H5...O2*          | 0.95       | 2.74         | 3.342(3)     | 122.1       | -x+1, -y, -z          |
| C5-H5...O2           | 0.95       | 3.21         | 3.735(3)     | 116.7       |                       |
| <b>BIPY•racPSA</b>   |            |              |              |             |                       |
| O3-H3...N1           | 0.84       | 1.82         | 2.6573(14)   | 175.9       |                       |
| O2-H22...N2*         | 0.84       | 1.82         | 2.6578(15)   | 171.9       | -x+3/2, y+1/2, -z+1/2 |
| C1-H1...O4*          | 0.95       | 2.38         | 3.3105(18)   | 166.7       | x+1/2, -y+1/2, z+1/2  |
| C8-H8...O2*          | 0.95       | 2.55         | 3.421(2)     | 153.1       | x+3/2, -y+1/2, z+1/2  |
| C10-H10...O1*        | 0.95       | 2.60         | 3.354(2)     | 136.8       | x+1/2, -y+1/2, z-1/2  |
| C17-H17...O3*        | 1.00       | 2.42         | 3.3727(18)   | 158.3       | x-1/2, -y+1/2, z-1/2  |
| <b>ETBIPY•racPSA</b> |            |              |              |             |                       |
| O1-H1...N1B          | 0.84       | 1.80         | 2.622(4)     | 167.5       |                       |
| O3-H3...N1A          | 0.84       | 1.77         | 2.609(3)     | 173.4       |                       |
| C5A-H5A...O4         | 0.95       | 2.69         | 3.349(4)     | 127.4       |                       |
| C1B-H1B...O2         | 0.95       | 2.98         | 3.527(4)     | 117.9       |                       |
| C5B-H5B...O1*        | 0.95       | 2.64         | 3.435(4)     | 141.7       | -x+1, -y, -z+1        |
| <b>ETBIPY•(S)PSA</b> |            |              |              |             |                       |
| O1C-H1C...N2A        | 0.84       | 1.77         | 2.601(3)     | 172.5       |                       |
| C10A-H10A...O2C      | 0.95       | 2.74         | 3.382(3)     | 125.4       |                       |
| O3C-H3C...N2B        | 0.84       | 1.80         | 2.631(3)     | 169.3       |                       |
| C11B-H11B...O4C      | 0.95       | 2.64         | 3.319(4)     | 128.4       |                       |
| O3D-H3D...N1B        | 0.84       | 1.79         | 2.628(3)     | 172.8       |                       |
| C5B-H5B...O4D        | 0.95       | 2.65         | 3.331(3)     | 128.7       |                       |
| O1D-H1D...N1A*       | 0.84       | 1.77         | 2.601(3)     | 168.6       | x, y-1, z+1           |
| C5A-H5A...O2D*       | 0.95       | 2.72         | 3.377(3)     | 127.2       | x, 1+y, z-1           |

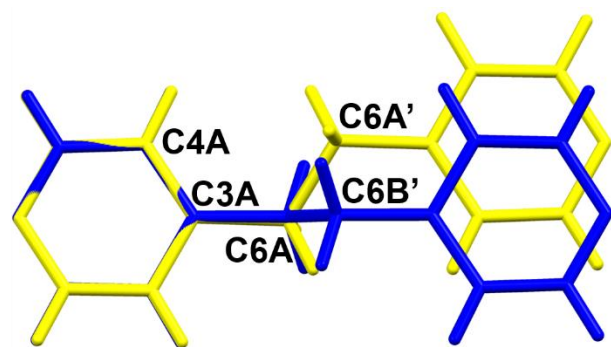

(a)

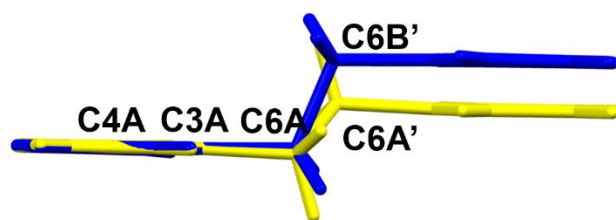

(b)

**Figure S 1** Overlap of the two different conformers of ETBIPY (molecule A- yellow, molecule B- blue) in ETBIPY•racPSA from the top (a) and side view (b). Atoms used to describe torsional differences are labelled accordingly.

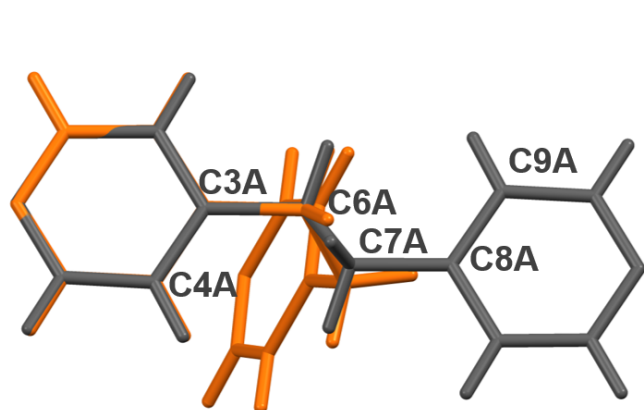

(a)

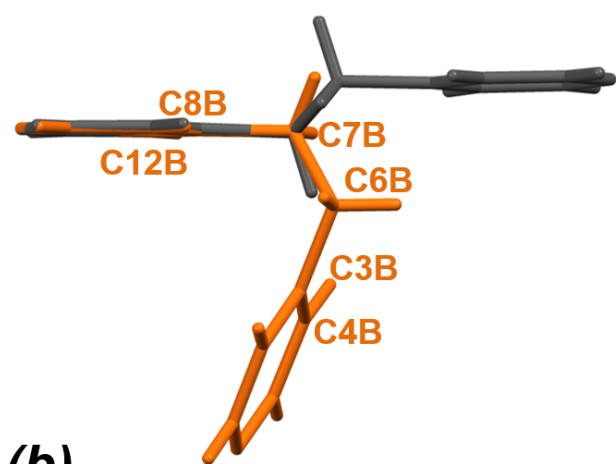

(b)

**Figure S 2** The difference between the two symmetrically independent ETBIPYs (molecule A- grey, molecule B- orange) in ETBIPY•(S)PSA from the top (a) and side view (b). Atoms used to describe torsional differences are labelled accordingly.

### 3. Thermal analysis of cocrystals

Differential Scanning Calorimetry (DSC) was carried out using a Perkin Elmer Pyris 6 under a N<sub>2</sub> gas purge (flow rate of 20.0 ml/min). Experiments were conducted over a temperature range of 30 °C to 350 °C. DSCs for multicomponent crystals and their relevant starting materials are shown in Fig. S3-S7.

The DSC curve of BIPY•PTA shows one endotherm corresponding to the melting point of the crystal ( $T_{\text{on}}=158.9\text{ }^{\circ}\text{C}$ ,  $T_{\text{peak}}=161.2\text{ }^{\circ}\text{C}$ ). The melting point of the cocrystal is located between the melting points of the two starting material, BIPY ( $T_{\text{on}}=108.6\text{ }^{\circ}\text{C}$ ,  $T_{\text{peak}}=111.2\text{ }^{\circ}\text{C}$ ) and PTA ( $T_{\text{on}}=178.0\text{ }^{\circ}\text{C}$ ,  $T_{\text{peak}}=181.8\text{ }^{\circ}\text{C}$ ). BIPY tend to hydrate during the sample preparation (grinding) for DSC measurement thus the first endotherm observed on the DSC curve is related to the loss of water of the BIPY•H<sub>2</sub>O. (**Figure S3**)

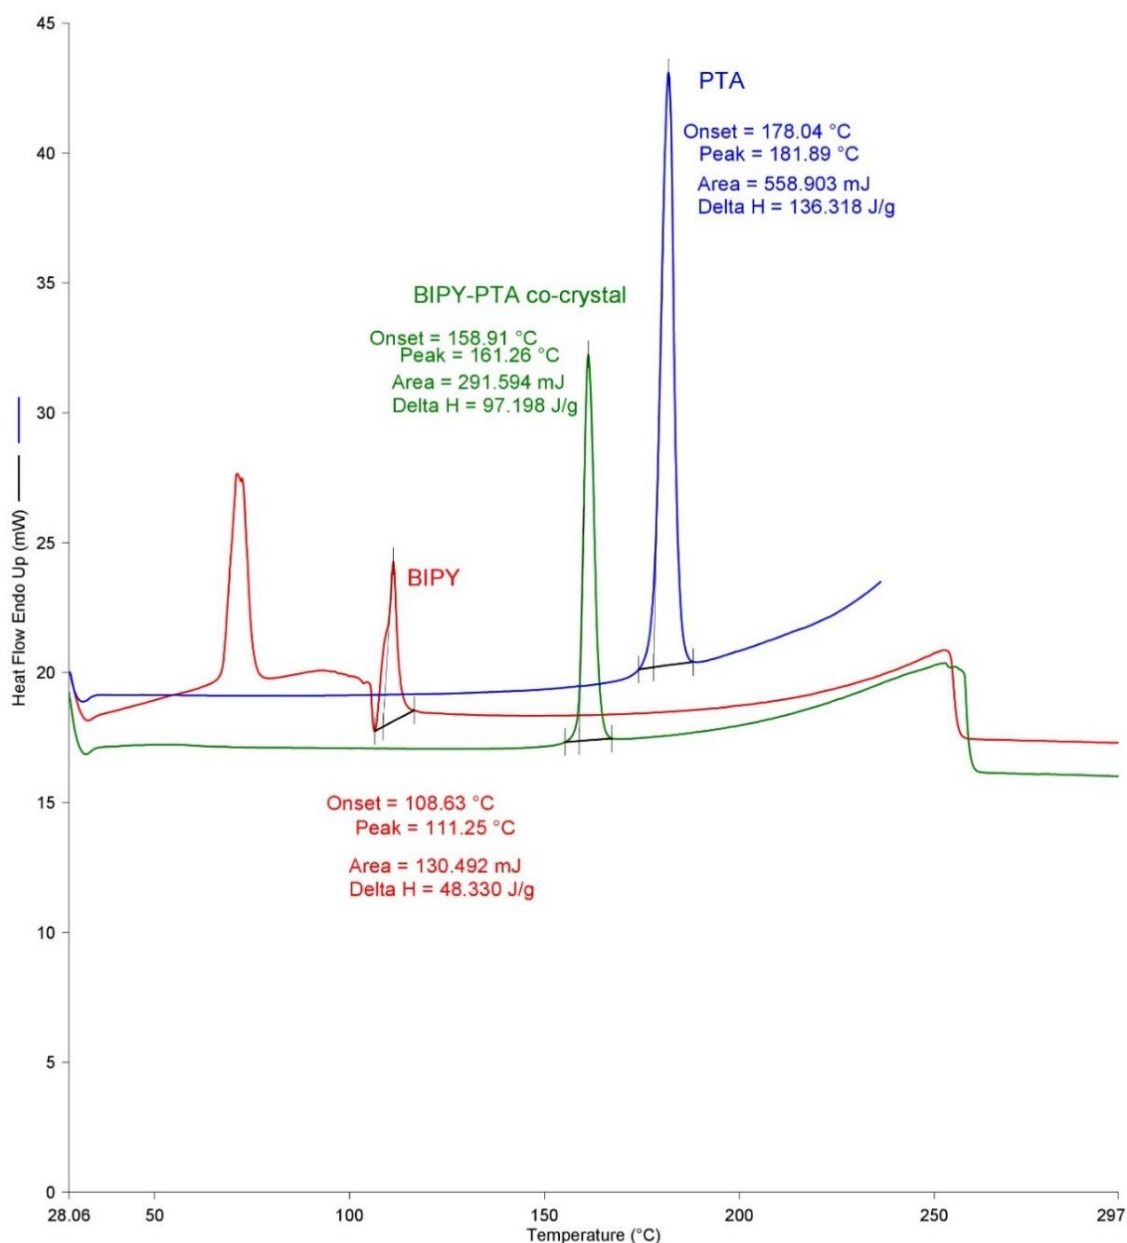

**Figure S3** DSC curve of BIPY•PTA and the individual starting materials, BIPY and PTA.

The DSC curve of BIPY•racPBA crystals shows one endotherm corresponding to the melting point of the crystal ( $T_{\text{on}} = 80.5\text{ }^{\circ}\text{C}$ ,  $T_{\text{peak}} = 84.1\text{ }^{\circ}\text{C}$ ). (**Figure S4**)

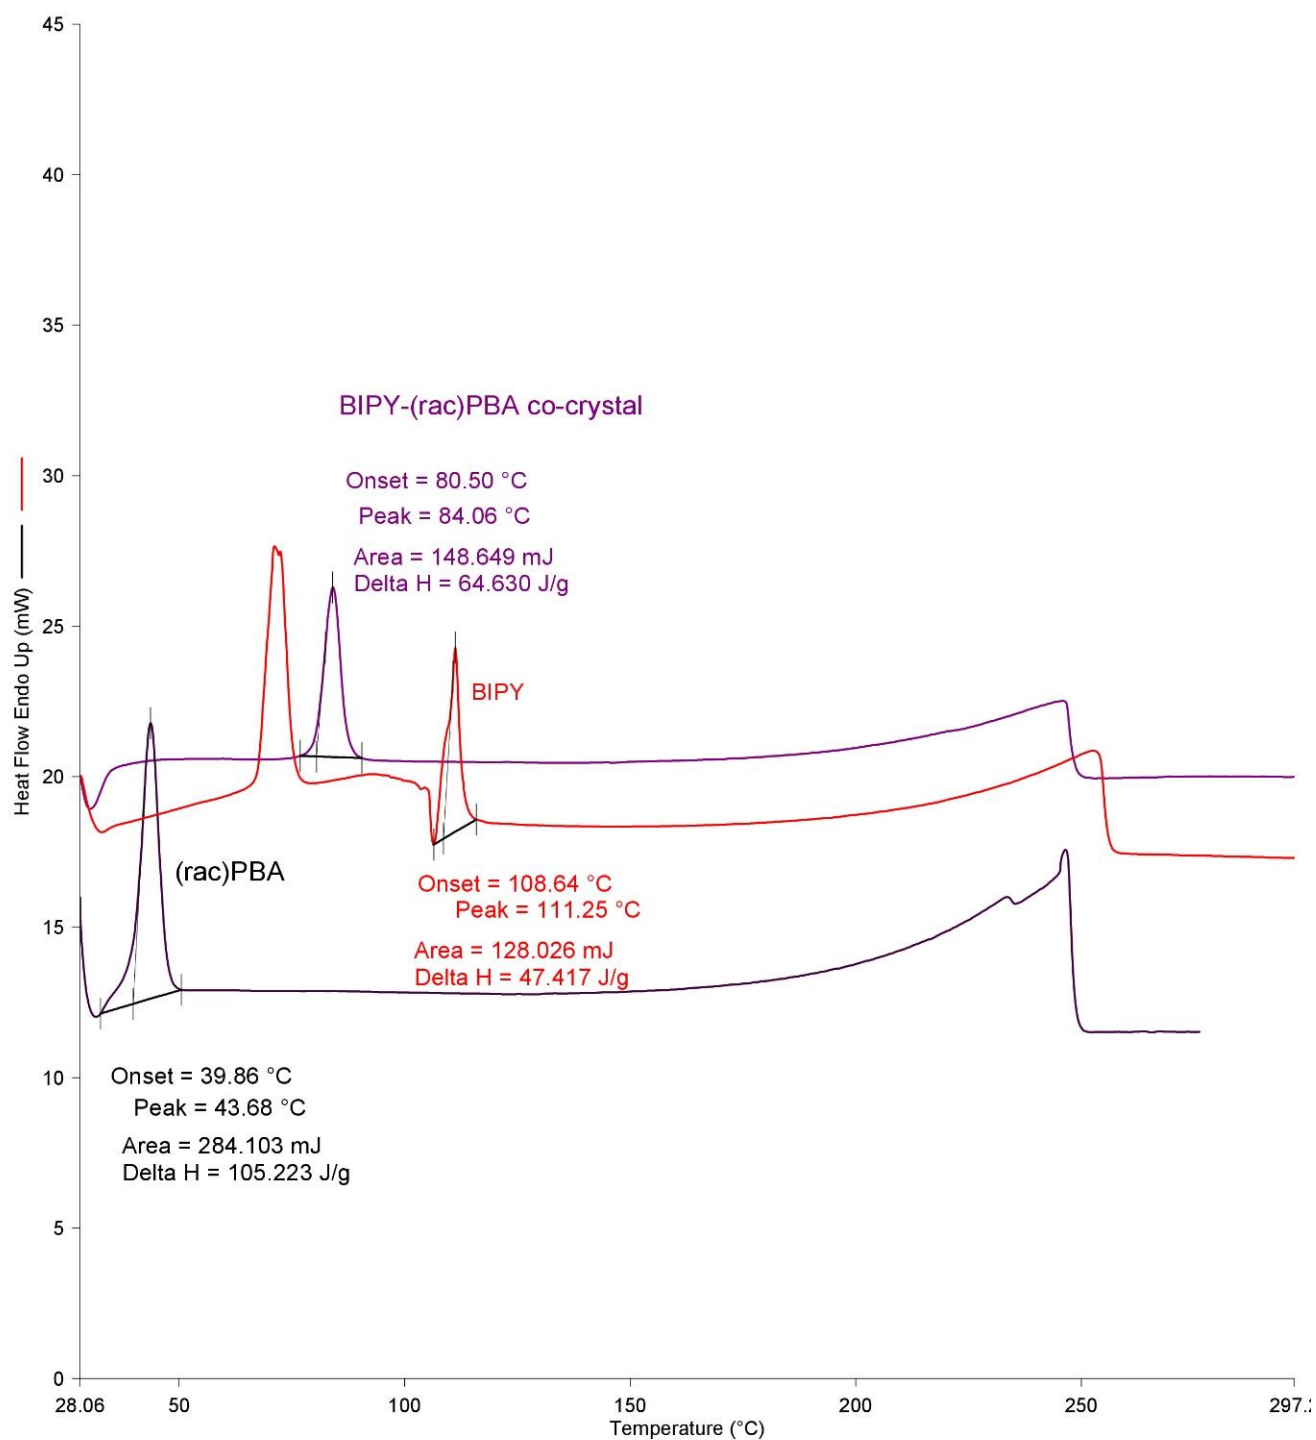

**Figure S4** DSC curve of BIPY•racPBA.

The DSC curve of BIPY•racPSA crystals shows one endotherm corresponding to the melting point of the crystal ( $T_{\text{on}} = 148.4\text{ }^{\circ}\text{C}$ ,  $T_{\text{peak}} = 150.4\text{ }^{\circ}\text{C}$ ). (**Figure S5**)

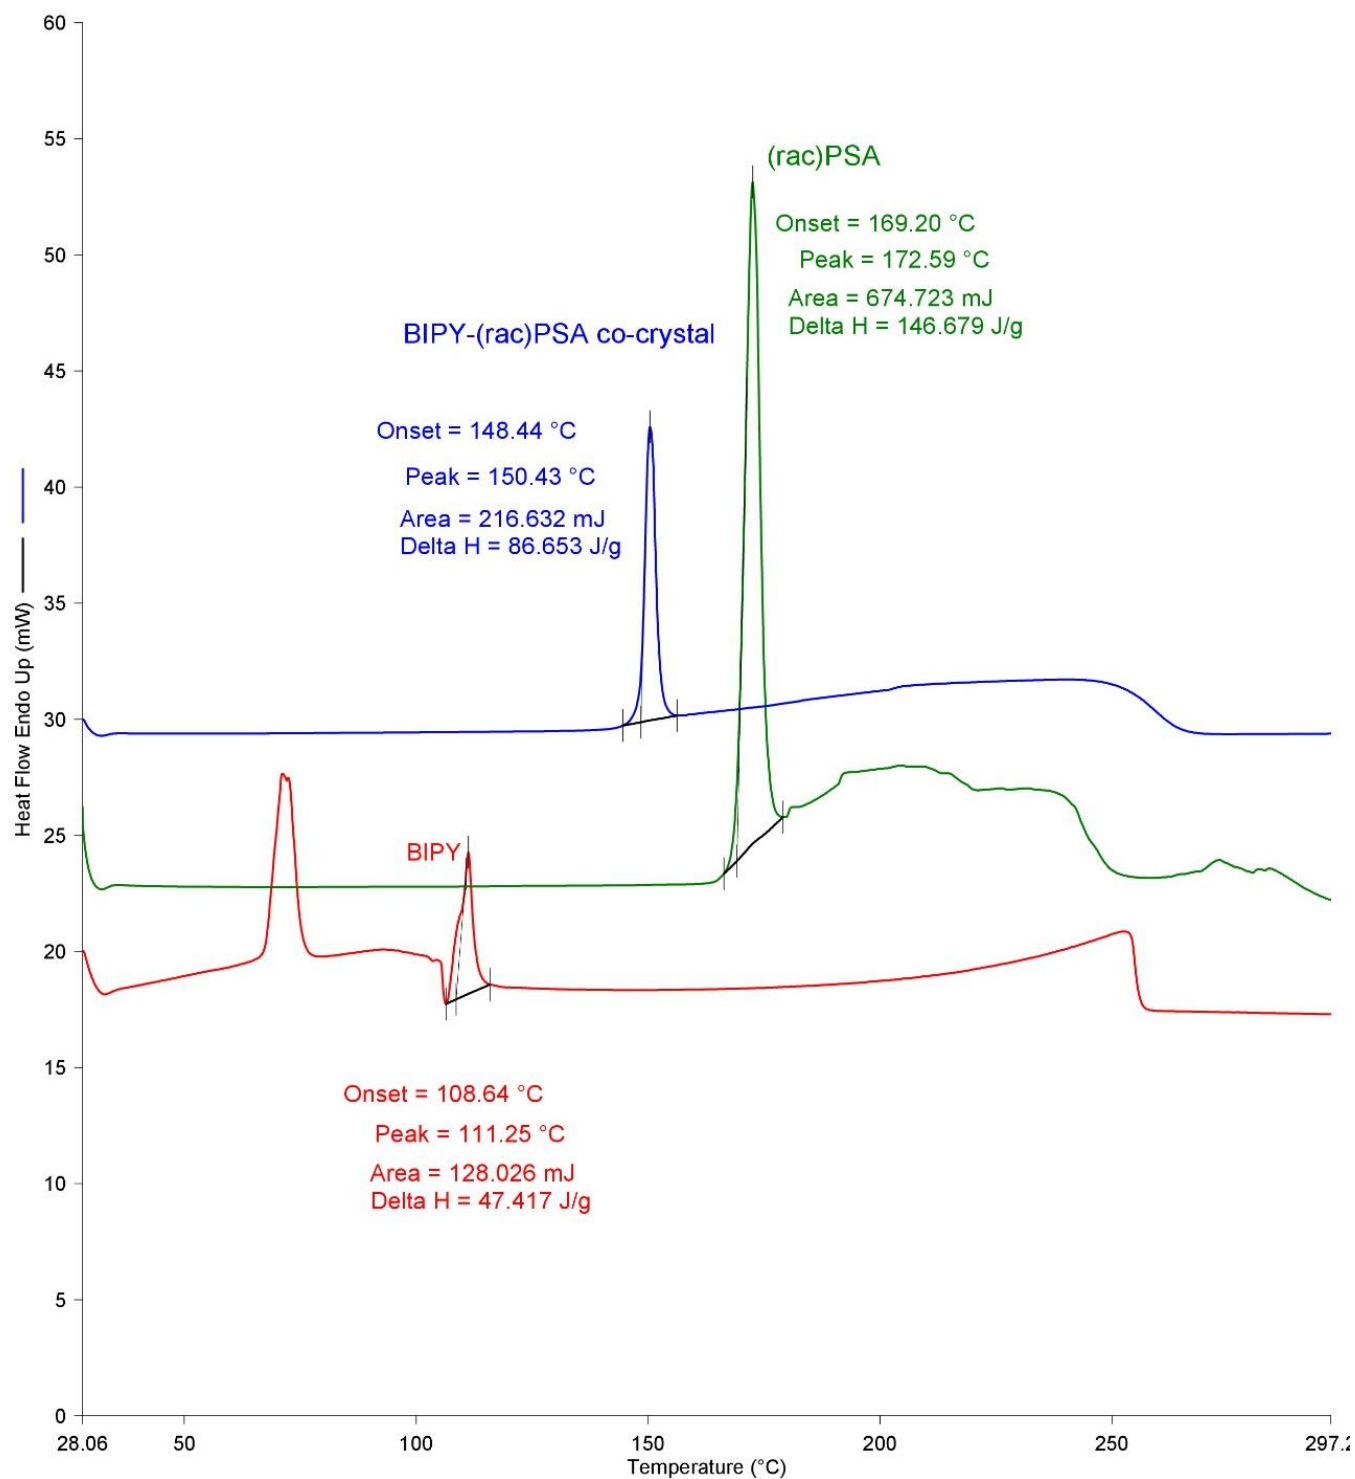

**Figure S5** DSC curve of BIPY•racPSA.

The DSC curve of ETBIPY•racPSA crystals shows one endotherm corresponding to the melting point of the crystal ( $T_{\text{on}} = 185.8\text{ }^{\circ}\text{C}$ ,  $T_{\text{peak}} = 188.0\text{ }^{\circ}\text{C}$ ) (**Figure S6**).

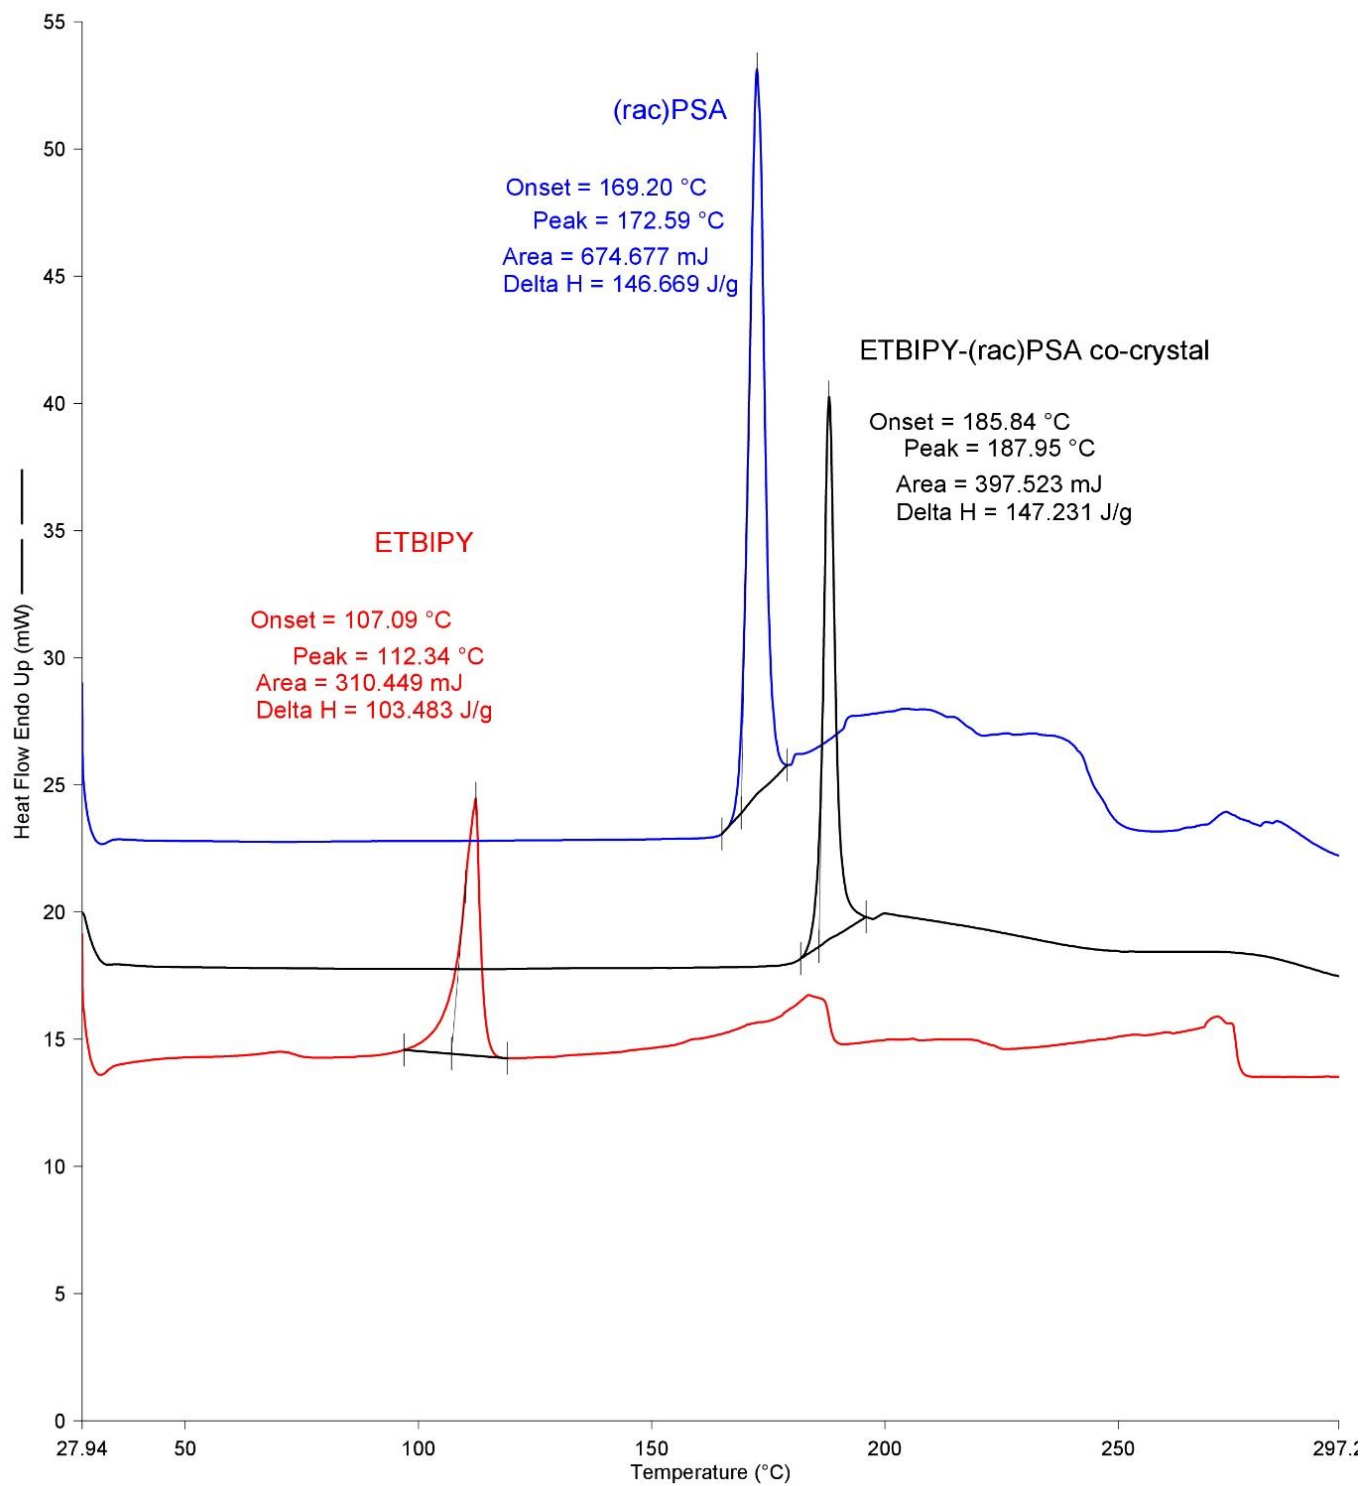

**Figure S6** DSC curve of ETBIPY•racPSA.



The DSC curve of ETBIPY•(S)PSA crystals shows a more complex melting process. The melting point of the cocrystal ( $T_{\text{on}} = 147.0\text{ }^{\circ}\text{C}$ ,  $T_{\text{peak}} = 151.4\text{ }^{\circ}\text{C}$ ) is between the melting points of the two starting material, ETBIPY ( $T_{\text{on}} = 107.1\text{ }^{\circ}\text{C}$ ,  $T_{\text{peak}} = 112.3\text{ }^{\circ}\text{C}$ ) and (S)-PSA ( $T_{\text{on}} = 178.2\text{ }^{\circ}\text{C}$ ,  $T_{\text{peak}} = 182.5\text{ }^{\circ}\text{C}$ ). (**Figure S7**).

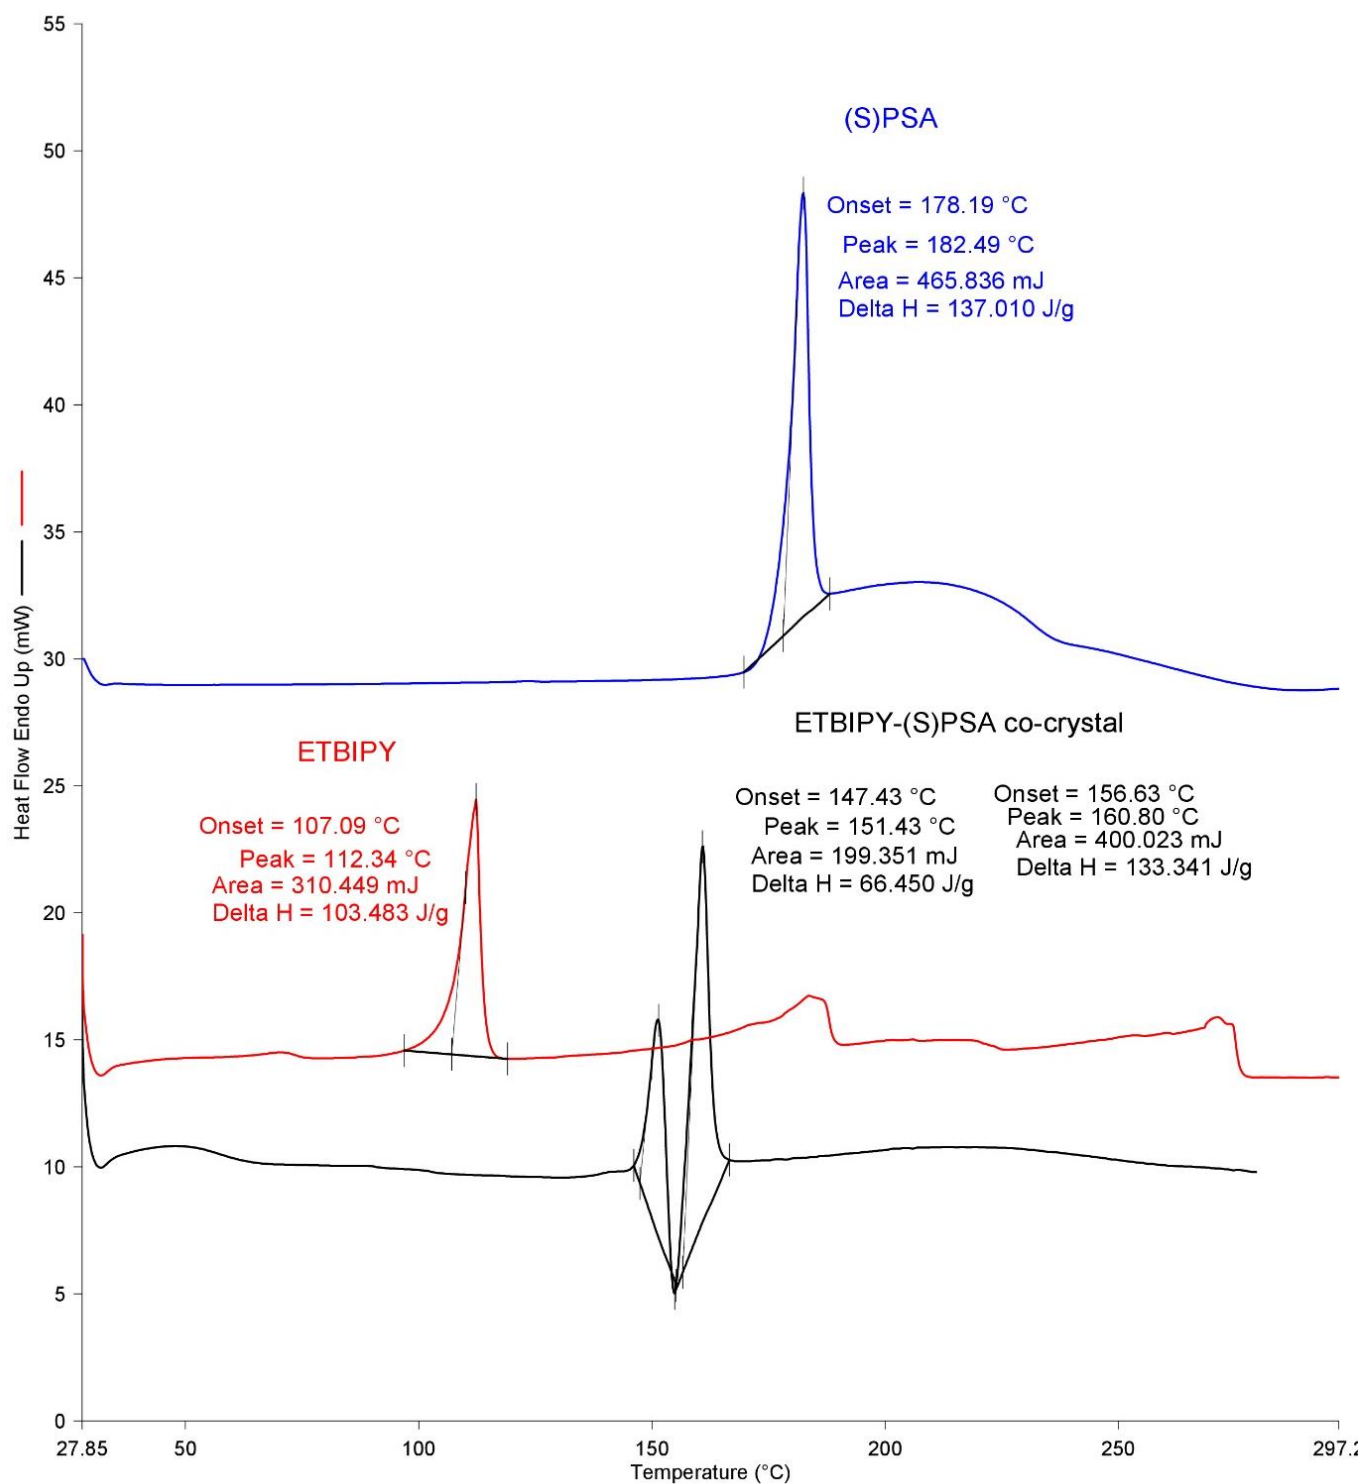

**Figure S7** DSC curve of ETBIPY•(S)PSA

#### 4. Powder X-ray analysis

Powder X-ray diffraction (PXRD) data were recorded on a Bruker D2 phaser diffractometer using CuK $\alpha$  radiation (1.54184 Å) generated at 30 kV and 10 mA. Simulated powder patterns of crystal structures were calculated using Mercury<sup>6</sup> and compared with the experimental patterns to confirm bulk phase purity. In order to determine whether the cocrystals can be obtained mechanochemically, the starting materials were ground with a mortar and pestle for thirty minutes and the resulting compounds were analysed by PXRD.

Powder X-ray analysis was conducted to show that the structure detected by using one single crystal only (**Figure S8-S12**, green- single crystal, calculated) is representative to the bulk material (**Figure S8-S12**, red-bulk). Also PXRD analysis was used to show if the cocrystal can be prepared via a more environmental friendly method by using a minimal amount of solvent. The two starting material were ground in a 1:1 ratio with several drops of solvent and after 30 mins the PXRD pattern was collected (**Figure S8-S12**, blue-grinding) and was compared to the pattern of the starting materials (**Figure S8-S12**, light blue- BIPY or ETBIPY, purple- acid). The single crystal structure is representative to the bulk material in all cases.

The patterns for the single crystal and the ground material of BIPY•PTA are quite similar and clearly differ from the starting compounds. However, the match is not perfect and several peaks related to BIPY and PTA are still noticeable, therefore partial reaction occurred. In all the other structures the PXRD obtained from the ground material were poor quality and thus the outcome of the grinding experiments are inconclusive.

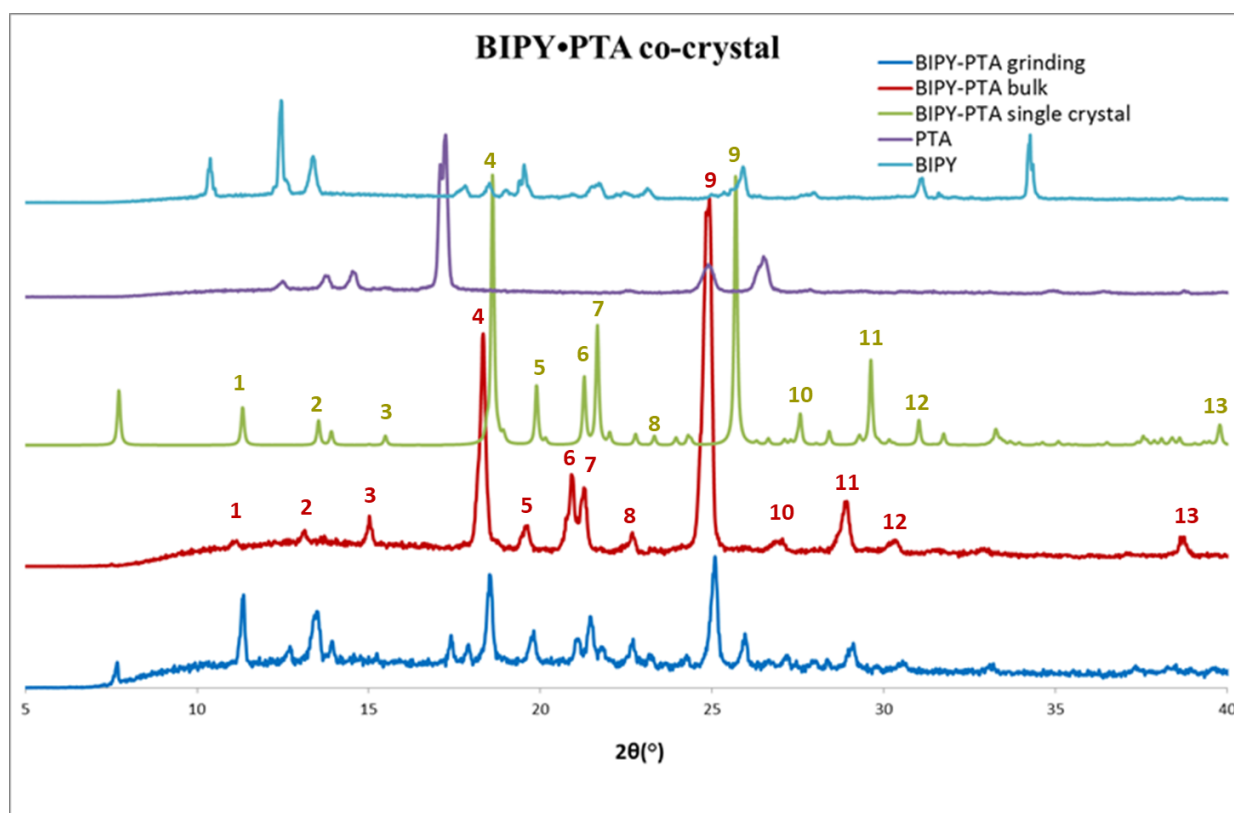

**Figure S8** Comparison of PXRD patterns: pure BIPY(light blue), pure PTA (purple), the pattern generated from single crystal structure of BIPY•PTA (green), PXRD pattern of the bulk of the crystallisation (BIPY•PTA bulk -red) and the result of the solvent drop grinding (BIPY•PTA blue).

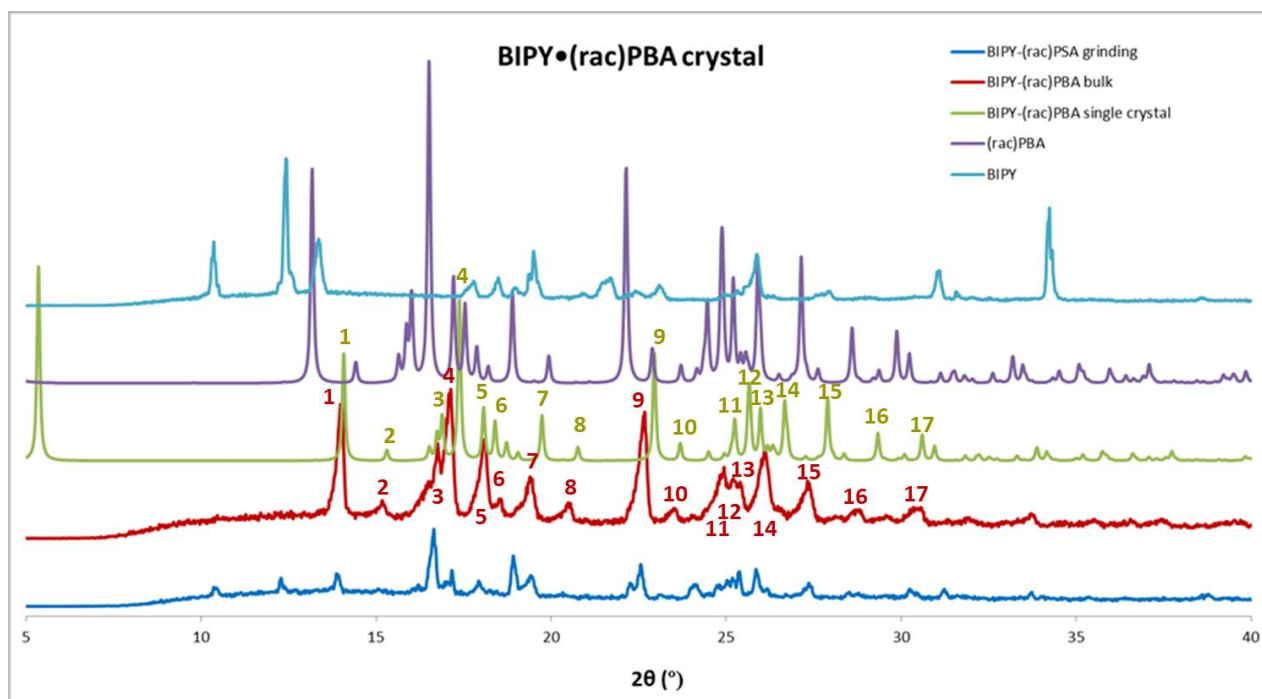

**Figure S9** Comparison of PXRD patterns: pure BIPY (light blue), pure racPBA (purple), the pattern generated from single crystal structure of BIPY•racPBA (green), PXRD pattern of the bulk of the crystallisation (BIPY•racPBA bulk-red) and the result of the solvent drop grinding (BIPY•racPBA blue).

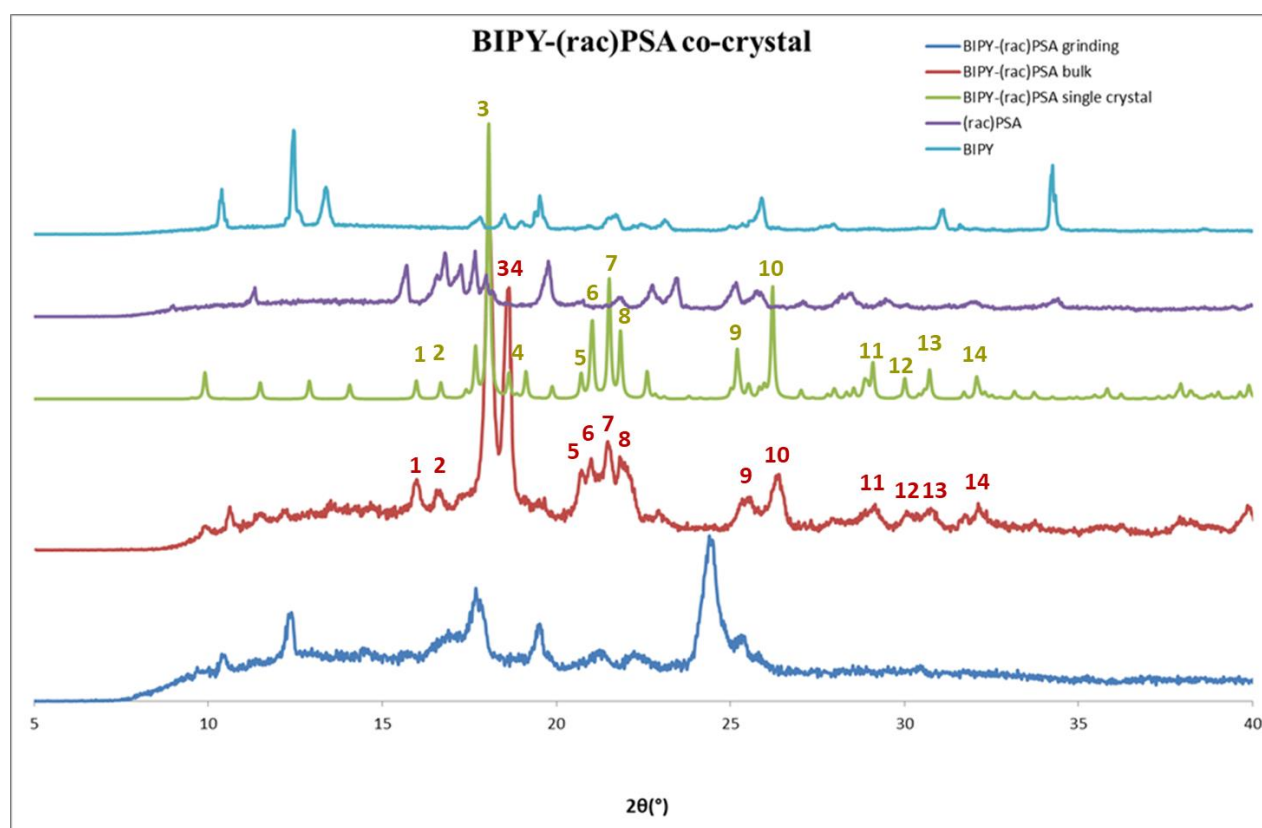

**Figure S10** Comparison of PXRD patterns: pure BIPY (light blue), pure racPSA (purple), the pattern generated from single crystal structure of BIPY•racPSA (green), PXRD pattern of the bulk of the crystallisation (BIPY•racPSA bulk-red) and the result of the solvent drop grinding (BIPY•racPSA blue).

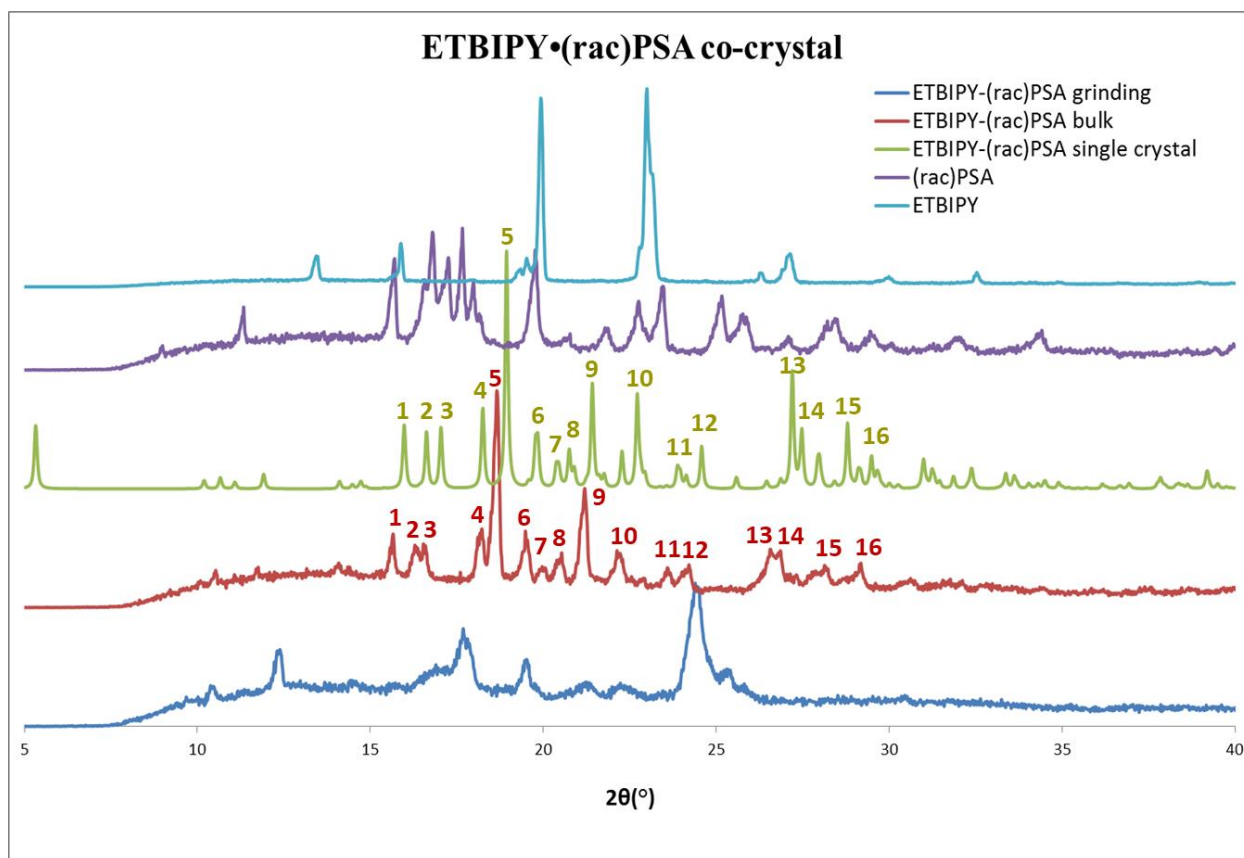

**Figure S11** Comparison of PXRD patterns: pure ETBIPY (light blue), pure racPSA (purple), the pattern generated from single crystal structure of ETBIPY•racPSA (green), PXRD pattern of the bulk of the crystallisation (ETBIPY•racPSA bulk- red) and the result of the solvent drop grinding (ETBIPY•racPSA blue).

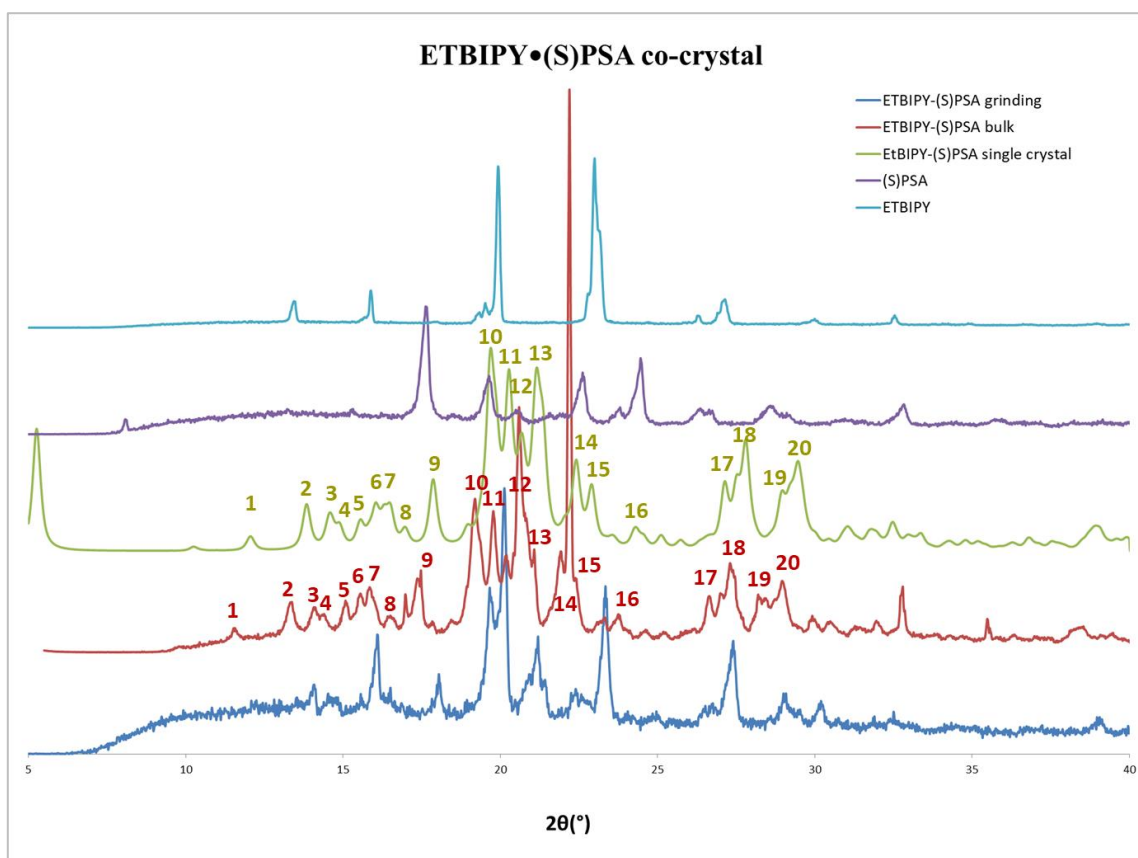

**Figure S12** Comparison of PXRD patterns: pure ETBIPY (light blue), pure (S)PSA (purple), the pattern generated from single crystal structure of ETBIPY•(S)PSA (green, full with at half maximum set to 0.3), PXRD pattern of the bulk of the crystallisation (ETBIPY•(S)PSA bulk- red) and the result of the solvent drop grinding (ETBIPY•(S)PSA blue).



## 5. Energy calculations and energy frameworks

The lattice energies for the fragments in the molecular systems considered in this work were calculated with the aid of equation 1,

$$E_{lat} = \frac{1}{2} \sum_{R_{AB} < R} N * E_{tot}^{AB} \quad (1)$$

where N is the number of molecular pairs in the cluster with a particular interaction energy. For BIPY•PTA, BIPY•racPBA and BIPY•racPSA the interaction energies were calculated with CrystalExplorer<sup>7</sup> at the HF/3-21G level of theory for a 20 Å radius and the results were visualised in the form of energy frameworks in Figure S13, S14 and S15, respectively.

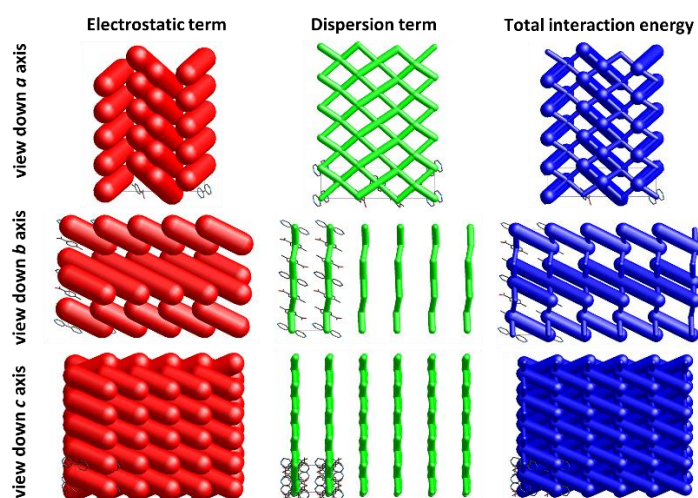

**Figure S13** Energy frameworks for BIPY•PTA

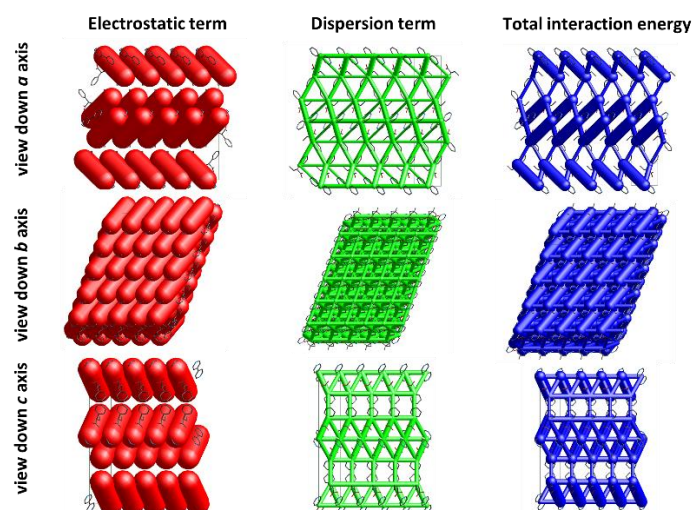

**Figure S14** Energy frameworks for BIPY•racPBA



To visualise the subtle differences in the supramolecular architecture of the chiral and the racemic crystals in terms of energetics, interaction energies calculated using the CE-B3LYP model for a 20 Å radius were used to create the energy frameworks (Figure S17). The energy framework of both structures are very similar when the electrostatic contributions are compared but subtle differences are noted in the dispersion components (see black arrows on Figure S17). The net interaction energy framework reveals layers where weaker interaction is observed in the ETBIPY•(S)PSA structure.

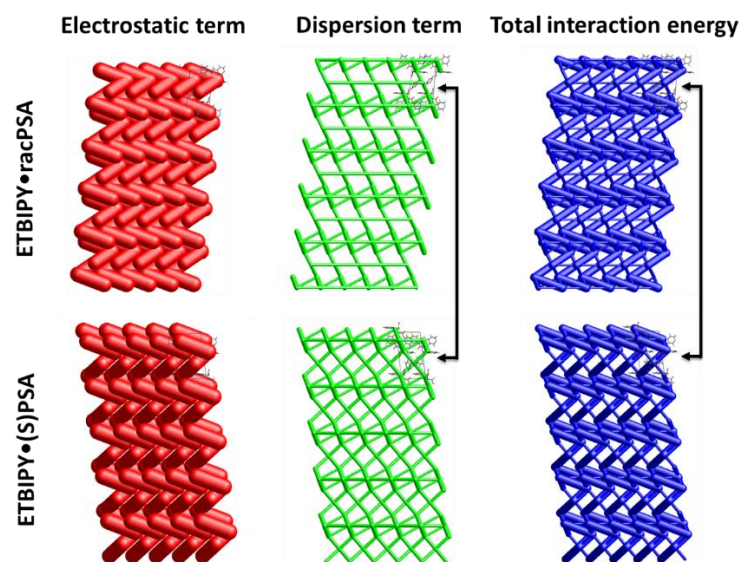

**Figure S17** Energy frameworks for ETBIPY•racPSA and ETBIPY•(S)PSA. The energy scale factor is 300 and the energy threshold is 12 kJ mol<sup>-1</sup>. Structures are shown down the *a* axis.

## 6. Hirshfeld surface analysis (additional fingerprint plots)

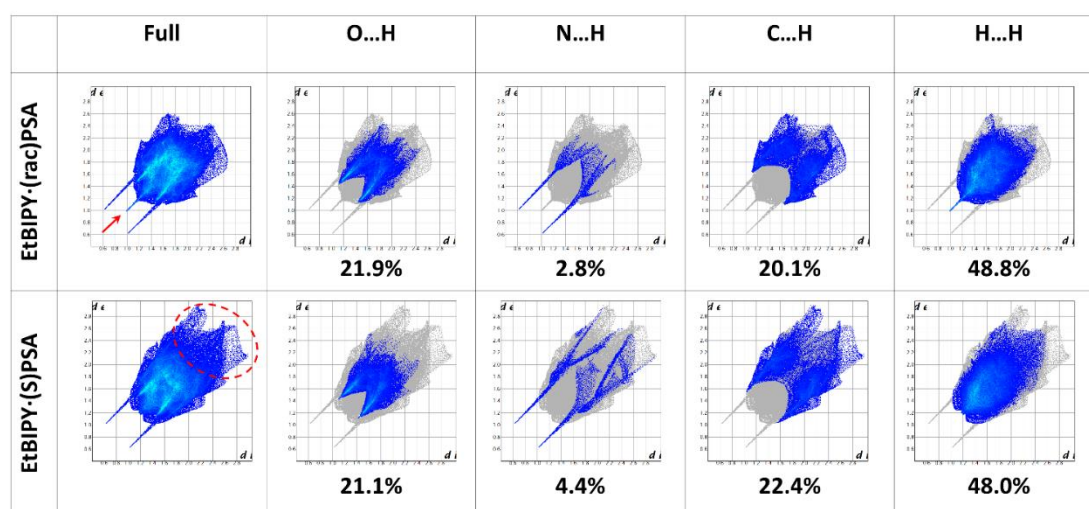

**Figure S18** Fingerprint plots calculated for the supramolecular units (ETBIPY•racPSA: (*R*)PSA...ETBIPY(*molA*)...(S)PSA...ETBIPY(*molB*); ETBIPY•(S)PSA: ETBIPY(*molA*)...(S)PSA(*molD*)...ETBIPY(*molB*)...(S)PSA(*molC*)). The overall of shape of the plots differs in the H...H interactions: a short spike (red arrow) resulted from the proximity of the ortho hydrogen of the pyridine ring (H1B) and the hydrogen atom on the chiral carbon (H13). The more extended C...H interactions of the chiral crystal (red circle) suggest a less efficiently packed crystal. It is interesting to note that there is no significant difference between the % distributions in the different interactions.

## 7. Solubility measurements results

**Table S4** Solubility values for BIPY, PTA, racPSA, racPBA and their cocrystals measured in water and ethanol.

|               | solvent | mass of vial | mass of vial+ solvent | mass of vial+ solvent+ compound | mass of compound | mass of solvent | mass of paper | mass of paper+ undissolved compound | mass of undissolved | mass of dissolved | volume of solvent | solubility | solubility     | average solubility |
|---------------|---------|--------------|-----------------------|---------------------------------|------------------|-----------------|---------------|-------------------------------------|---------------------|-------------------|-------------------|------------|----------------|--------------------|
| unit          |         | (g)          | (g)                   | (g)                             | (g)              | (g)             | (g)           | (g)                                 | (g)                 | (g)               | (mL)              | (g/g)      | (mg/mL)        | (mg/mL)            |
| <b>BIPY</b>   | ethanol | 150.1820     | 159.2330              | 160.8580                        | 1.6250           | 9.0510          | 3.179         | 3.544                               | 0.3650              | 1.2600            | 11.4715           | 0.1392     | excluded       |                    |
|               |         | 154.0390     | 158.1430              | 159.3060                        | 1.1630           | 4.1040          | 3.218         | 4.025                               | 0.8070              | 0.3560            | 5.2015            | 0.0867     | <b>68.44</b>   |                    |
|               |         | 151.9580     | 157.0250              | 158.1420                        | 1.1170           | 5.0670          | 3.181         | 3.796                               | 0.6150              | 0.5020            | 6.4221            | 0.0991     | <b>78.17</b>   | <b>73.30</b>       |
|               | water   | 151.7790     | 167.6150              | 168.6020                        | 0.9870           | 15.8360         | 3.193         | 3.716                               | 0.5230              | 0.4640            | 15.8360           | 0.0293     | <b>29.30</b>   |                    |
|               |         | 151.8670     | 167.4590              | 168.3040                        | 0.8450           | 15.5920         | 3.238         | 3.530                               | 0.2920              | 0.5530            | 15.5920           | 0.0355     | <b>35.47</b>   |                    |
|               |         | 154.2250     | 168.6620              | 169.5210                        | 0.8590           | 14.4370         | 3.214         | 3.664                               | 0.4500              | 0.4090            | 14.4370           | 0.0283     | <b>28.33</b>   | <b>31.03</b>       |
| <b>PTA</b>    | ethanol | 143.3110     | 150.9000              | 153.1050                        | 2.2050           | 7.5890          | 3.257         | 4.882                               | 1.6250              | 0.5800            | 9.6185            | 0.0764     | <b>60.30</b>   |                    |
|               |         | 139.0110     | 149.9200              | 151.5340                        | 1.6140           | 10.9090         | 3.187         | 3.836                               | 0.6490              | 0.9650            | 13.8264           | 0.0885     | <b>69.79</b>   |                    |
|               |         | 143.2600     | 151.8740              | 153.2960                        | 1.4220           | 8.6140          | 3.212         | 4.288                               | 1.0760              | 0.3460            | 10.9176           | 0.0402     | excluded       | <b>65.05</b>       |
|               | water   | 118.5850     | 132.0510              | 152.7300                        | 20.6790          | 13.4660         | 3.198         | 4.569                               | 1.3710              | 19.3080           | 13.4660           | 1.4338     | <b>1433.83</b> |                    |
|               |         | 122.5150     | 133.7230              | 154.5640                        | 20.8410          | 11.2080         | 3.205         | 4.505                               | 1.3000              | 19.5410           | 11.2080           | 1.7435     | <b>1743.49</b> |                    |
|               |         | 122.9810     | 134.2790              | 154.8110                        | 20.5320          | 11.2980         | 3.157         | 4.429                               | 1.2720              | 19.2600           | 11.2980           | 1.7047     | <b>1704.73</b> | <b>1627.35</b>     |
| <b>racPSA</b> | ethanol | 141.1650     | 151.4940              | 152.1750                        | 0.6810           | 10.3290         | 3.233         | 3.512                               | 0.2790              | 0.4020            | 13.0913           | 0.0389     | <b>30.71</b>   |                    |
|               |         | 141.3680     | 151.1360              | 151.6620                        | 0.5260           | 9.7680          | 3.208         | 3.472                               | 0.2640              | 0.2620            | 12.3802           | 0.0268     | <b>21.16</b>   |                    |
|               |         | 142.6380     | 149.3060              | 150.3710                        | 1.0650           | 6.6680          | 3.203         | 3.935                               | 0.7320              | 0.3330            | 8.4512            | 0.0499     | <b>39.40</b>   | <b>30.42</b>       |
|               | water   | 141.8750     | 149.1490              | 149.6430                        | 0.4940           | 7.2740          | 3.17          | 3.58                                | 0.4100              | 0.0840            | 7.2740            | 0.0115     | <b>11.55</b>   |                    |
|               |         | 140.8270     | 154.3690              | 154.8560                        | 0.4870           | 13.5420         | 3.179         | 3.525                               | 0.3460              | 0.1410            | 13.5420           | 0.0104     | <b>10.41</b>   |                    |
|               |         | 140.6640     | 154.1940              | 154.6910                        | 0.4970           | 13.5300         | 3.203         | 3.552                               | 0.3490              | 0.1480            | 13.5300           | 0.0109     | <b>10.94</b>   | <b>10.97</b>       |
| <b>racPBA</b> | ethanol | 141.9430     | 148.3940              | 149.5920                        | 1.1980           | 6.4510          | 3.123         | 3.671                               | 0.5480              | 0.6500            | 8.1762            | 0.1008     | <b>79.50</b>   |                    |
|               |         | 134.1450     | 142.1640              | 143.1880                        | 1.0240           | 8.0190          | 3.121         | 3.583                               | 0.4620              | 0.5620            | 10.1635           | 0.0701     | <b>55.30</b>   |                    |
|               |         | 136.0300     | 139.6160              | 140.6030                        | 0.9870           | 3.5860          | 3.152         | 4.061                               | 0.9090              | 0.0780            | 4.5450            | 0.0218     | excluded       | <b>67.40</b>       |
|               | water   | 142.2340     | 147.4650              | 147.8060                        | 0.3410           | 5.2310          | 3.128         | 3.21                                | 0.0820              | 0.2590            | 5.2310            | 0.0495     | <b>49.51</b>   |                    |
|               |         | 133.4820     | 145.7280              | 146.7480                        | 1.0200           | 12.2460         | 3.151         | 3.389                               | 0.2380              | 0.7820            | 12.2460           | 0.0639     | <b>63.86</b>   |                    |
|               |         | 131.0030     | 139.8190              | 140.1490                        | 0.3300           | 8.8160          | 3.186         | 3.303                               | 0.1170              | 0.2130            | 8.8160            | 0.0242     | excluded       | <b>56.69</b>       |



|                 | solvent | mass of<br>vial | mass of<br>vial+<br>solvent | mass of<br>vial+<br>solvent+<br>compound | mass of<br>compound | mass of<br>solvent | mass of<br>paper | mass of<br>paper+<br>undissolved<br>compound | mass of<br>undissolved | mass of<br>dissolved | volume of<br>solvent | solubility | solubility      | average<br>solubility |
|-----------------|---------|-----------------|-----------------------------|------------------------------------------|---------------------|--------------------|------------------|----------------------------------------------|------------------------|----------------------|----------------------|------------|-----------------|-----------------------|
| unit            |         | (g)             | (g)                         | (g)                                      | (g)                 | (g)                | (g)              | (g)                                          | (g)                    | (g)                  | (mL)                 | (g/g)      | (mg/mL)         | (mg/mL)               |
| <b>BIPY-PTA</b> | ethanol | 148.5160        | 156.6860                    | 157.0040                                 | 0.3180              | 8.1700             | 3.3              | 3.413                                        | 0.1130                 | 0.2050               | 10.3549              | 0.0251     | <b>19.80</b>    |                       |
|                 |         | 151.2420        | 159.9360                    | 159.6360                                 | -0.3000             | 8.6940             | 3.296            | 3.384                                        | 0.0880                 | -0.3880              | 11.0190              | -0.0446    | <b>excluded</b> |                       |
|                 |         | 124.7620        | 131.8630                    | 132.2700                                 | 0.4070              | 7.1010             | 3.304            | 3.49                                         | 0.1860                 | 0.2210               | 9.0000               | 0.0311     | <b>24.56</b>    | <b>22.18</b>          |
|                 | water   | 149.1460        | 161.0560                    | 161.3800                                 | 0.3240              | 11.9100            | 3.298            | 3.413                                        | 0.1150                 | 0.2090               | 11.9100              | 0.0175     | <b>17.55</b>    |                       |
|                 |         | 145.0740        | 152.8070                    | 153.0370                                 | 0.2300              | 7.7330             | 3.3              | 3.503                                        | 0.2030                 | 0.0270               | 7.7330               | 0.0035     | <b>excluded</b> |                       |
|                 |         | 151.3320        | 163.7690                    | 164.0830                                 | 0.3140              | 12.4370            | 3.218            | 3.364                                        | 0.1460                 | 0.1680               | 12.4370              | 0.0135     | <b>13.51</b>    | <b>15.53</b>          |
| <b>BIPY-PSA</b> | ethanol | 138.8950        | 141.8950                    | 148.0860                                 | 6.1910              | 3.0000             | 3.213            | 3.298                                        | 0.0850                 | 6.1060               | 3.8023               | 2.0353     | <b>excluded</b> |                       |
|                 |         | 138.7890        | 141.7190                    | 144.1040                                 | 2.3850              | 2.9300             | 3.2              | 3.314                                        | 0.1140                 | 2.2710               | 3.7136               | 0.7751     | <b>611.54</b>   |                       |
|                 |         | 143.2000        | 145.5400                    | 147.0000                                 | 1.4600              | 2.3400             | 3.189            | 3.303                                        | 0.1140                 | 1.3460               | 2.9658               | 0.5752     | <b>453.84</b>   | <b>532.69</b>         |
|                 | water   | 142.1710        | 150.9450                    | 151.1260                                 | 0.1810              | 8.7740             | 3.13             | 3.161                                        | 0.0310                 | 0.1500               | 8.7740               | 0.0171     | <b>excluded</b> |                       |
|                 |         | 136.7560        | 142.8800                    | 143.1080                                 | 0.2280              | 6.1240             | 3.168            | 3.229                                        | 0.0610                 | 0.1670               | 6.1240               | 0.0273     | <b>27.27</b>    |                       |
|                 |         | 140.3770        | 145.9140                    | 146.2200                                 | 0.3060              | 5.5370             | 3.183            | 3.329                                        | 0.1460                 | 0.1600               | 5.5370               | 0.0289     | <b>28.90</b>    | <b>28.08</b>          |
| <b>BIPY-PBA</b> | ethanol | 123.1610        | 130.3240                    | 130.6900                                 | 0.3660              | 7.1630             | 3.2              | 3.431                                        | 0.2310                 | 0.1350               | 9.0786               | 0.0188     | <b>14.87</b>    |                       |
|                 |         | 121.4670        | 130.8170                    | 131.2520                                 | 0.4350              | 9.3500             | 3.19             | 3.402                                        | 0.2120                 | 0.2230               | 11.8504              | 0.0239     | <b>18.82</b>    |                       |
|                 |         | 123.7870        | 129.8680                    | 130.1550                                 | 0.2870              | 6.0810             | 3.22             | 3.41                                         | 0.1900                 | 0.0970               | 7.7072               | 0.0160     | <b>12.59</b>    | <b>15.42</b>          |
|                 | water   | 123.3280        | 134.0040                    | 134.2410                                 | 0.2370              | 10.6760            | 3.247            | 3.491                                        | 0.2440                 | -0.0070              | 10.6760              | -0.0007    | <b>excluded</b> |                       |
|                 |         | 122.0850        | 128.4750                    | 128.8580                                 | 0.3830              | 6.3900             | 3.127            | 3.313                                        | 0.1860                 | 0.1970               | 6.3900               | 0.0308     | <b>30.83</b>    |                       |
|                 |         | 123.0450        | 130.0760                    | 130.6380                                 | 0.5620              | 7.0310             | 3.224            | 3.422                                        | 0.1980                 | 0.3640               | 7.0310               | 0.0518     | <b>51.77</b>    | <b>41.30</b>          |

**Table S5** Solubility values for ETBIPY, racPSA, S-PSA and its cocrystals measured in water and ethanol.

|                      | solvent | mass of<br>vial | mass of<br>vial+<br>solvent | mass of<br>vial+<br>solvent+<br>compound | mass of<br>compound | mass of<br>solvent | mass of<br>paper | mass of<br>paper+<br>undissolved<br>compound | mass of<br>undissolved | mass of<br>dissolved | volume of<br>solvent | solubility | solubility      | average<br>solubility |
|----------------------|---------|-----------------|-----------------------------|------------------------------------------|---------------------|--------------------|------------------|----------------------------------------------|------------------------|----------------------|----------------------|------------|-----------------|-----------------------|
| unit                 |         | (g)             | (g)                         | (g)                                      | (g)                 | (g)                | (g)              | (g)                                          | (g)                    | (g)                  | (mL)                 | (g/g)      | (mg/mL)         | (mg/mL)               |
| <b>ETBIPY</b>        | ethanol | 148.7450        | 153.0880                    | 154.7400                                 | 1.6520              | 4.3430             | 3.1870           | 4.3650                                       | 1.1780                 | 0.4740               | 5.5044               | 0.1091     | <b>86.11</b>    |                       |
|                      |         | 150.9410        | 157.7070                    | 159.1010                                 | 1.3940              | 6.7660             | 3.2140           | 4.1150                                       | 0.9010                 | 0.4930               | 8.5754               | 0.0729     | <b>57.49</b>    |                       |
|                      |         | 152.5810        | 158.1060                    | 159.6620                                 | 1.5560              | 5.5250             | 3.1750           | 3.6720                                       | 0.4970                 | 1.0590               | 7.0025               | 0.1917     | <b>excluded</b> | <b>71.80</b>          |
|                      | water   | 147.7390        | 154.6590                    | 155.0120                                 | 0.3530              | 6.9200             | 3.2430           | 3.2940                                       | 0.0510                 | 0.3020               | 6.9200               | 0.0436     | <b>43.64</b>    |                       |
|                      |         | 151.0000        | 158.1060                    | 159.1190                                 | 1.0130              | 7.1060             | 3.2160           | 3.2700                                       | 0.0540                 | 0.9590               | 7.1060               | 0.1350     | <b>134.96</b>   |                       |
|                      |         | 152.7480        | 161.2160                    | 169.5210                                 | 8.3050              | 8.4680             | 3.1860           | 3.2500                                       | 0.0640                 | 8.2410               | 8.4680               | 0.9732     | <b>973.19</b>   | <b>89.30</b>          |
| <b>racPSA</b>        | ethanol | 141.1650        | 151.4940                    | 152.1750                                 | 0.6810              | 10.3290            | 3.2330           | 3.5120                                       | 0.2790                 | 0.4020               | 13.0913              | 0.0389     | <b>30.71</b>    |                       |
|                      |         | 141.3680        | 151.1360                    | 151.6620                                 | 0.5260              | 9.7680             | 3.2080           | 3.4720                                       | 0.2640                 | 0.2620               | 12.3802              | 0.0268     | <b>21.16</b>    |                       |
|                      |         | 142.6380        | 149.3060                    | 150.3710                                 | 1.0650              | 6.6680             | 3.2320           | 3.9350                                       | 0.7030                 | 0.3620               | 8.4512               | 0.0543     | <b>42.83</b>    | <b>31.57</b>          |
| <b>(S)PSA</b>        | water   | 141.8750        | 149.1400                    | 149.6430                                 | 0.5030              | 7.2650             | 3.1700           | 3.5800                                       | 0.4100                 | 0.0930               | 7.2650               | 0.0128     | <b>12.80</b>    |                       |
|                      |         | 140.8270        | 154.3690                    | 154.8560                                 | 0.4870              | 13.5420            | 3.1790           | 3.5250                                       | 0.3460                 | 0.1410               | 13.5420              | 0.0104     | <b>10.41</b>    |                       |
|                      |         | 140.6640        | 154.1940                    | 154.6910                                 | 0.4970              | 13.5300            | 3.2030           | 3.5520                                       | 0.3490                 | 0.1480               | 13.5300              | 0.0109     | <b>10.94</b>    | <b>11.38</b>          |
|                      | ethanol | 139.7880        | 147.4790                    | 147.9160                                 | 0.4370              | 7.6910             | 3.2430           | 3.5600                                       | 0.3170                 | 0.1200               | 9.7478               | 0.0156     | <b>12.31</b>    |                       |
|                      |         | 143.3180        | 151.7210                    | 152.1020                                 | 0.3810              | 8.4030             | 3.2100           | 3.5100                                       | 0.3000                 | 0.0810               | 10.6502              | 0.0096     | <b>7.61</b>     |                       |
|                      |         | 141.1490        | 148.8810                    | 149.1100                                 | 0.2290              | 7.7320             | 3.2300           | 3.4560                                       | 0.2260                 | 0.0030               | 9.7997               | 0.0004     | <b>excluded</b> | <b>9.96</b>           |
|                      | water   | 140.4880        | 151.9270                    | 152.3110                                 | 0.3840              | 11.4390            | 3.1380           | 3.2000                                       | 0.0620                 | 0.3220               | 11.4390              | 0.0281     | <b>28.15</b>    |                       |
|                      |         | 142.0700        | 151.0830                    | 151.7050                                 | 0.6220              | 9.0130             | 3.1700           | 3.2200                                       | 0.0500                 | 0.5720               | 9.0130               | 0.0635     | <b>excluded</b> |                       |
|                      |         | 141.7590        | 151.3080                    | 151.6760                                 | 0.3680              | 9.5490             | 3.2400           | 3.2800                                       | 0.0400                 | 0.3280               | 9.5490               | 0.0343     | <b>34.35</b>    | <b>31.25</b>          |
| <b>ETBIPY-racPSA</b> | ethanol | 139.2280        | 143.1900                    | 143.2740                                 | 0.0840              | 3.9620             | 3.1860           | 3.2440                                       | 0.0580                 | 0.0260               | 5.0215               | 0.0066     | <b>5.18</b>     |                       |
|                      |         | 142.7850        | 145.1370                    | 145.2090                                 | 0.0720              | 2.3520             | 3.2170           | 3.2540                                       | 0.0370                 | 0.0350               | 2.9810               | 0.0149     | <b>excluded</b> |                       |
|                      |         | 137.3360        | 141.6100                    | 141.7040                                 | 0.0940              | 4.2740             | 3.1800           | 3.2510                                       | 0.0710                 | 0.0230               | 5.4170               | 0.0054     | <b>4.25</b>     | <b>4.71</b>           |
|                      | water   | 139.3790        | 145.0620                    | 145.1650                                 | 0.1030              | 5.6830             | 3.2480           | 3.3340                                       | 0.0860                 | 0.0170               | 5.6830               | 0.0030     | <b>excluded</b> |                       |
|                      |         | 137.9110        | 144.3020                    | 144.3740                                 | 0.0720              | 6.3910             | 3.1960           | 3.2280                                       | 0.0320                 | 0.0400               | 6.3910               | 0.0063     | <b>6.26</b>     |                       |
|                      |         | 141.7170        | 148.2480                    | 148.3390                                 | 0.0910              | 6.5310             | 3.2340           | 3.2760                                       | 0.0420                 | 0.0490               | 6.5310               | 0.0075     | <b>7.50</b>     | <b>6.88</b>           |
| <b>ETBIPY-(S)PSA</b> | ethanol | 142.3110        | 147.4700                    | 149.3990                                 | 1.9290              | 5.1590             | 3.2020           | 3.3850                                       | 0.1830                 | 1.7460               | 6.5387               | 0.3384     | <b>267.03</b>   |                       |
|                      |         | 133.1220        | 138.3680                    | 139.8500                                 | 1.4820              | 5.2460             | 3.1880           | 3.3500                                       | 0.1620                 | 1.3200               | 6.6489               | 0.2516     | <b>198.53</b>   |                       |
|                      |         | 139.7020        | 147.5380                    | 148.2440                                 | 0.7060              | 7.8360             | 3.1730           | 3.2710                                       | 0.0980                 | 0.6080               | 9.9316               | 0.0776     | <b>excluded</b> | <b>232.78</b>         |

|      | solvent | mass of<br>vial | mass of<br>vial+<br>solvent | mass of<br>vial+<br>solvent+<br>compound | mass of<br>compound | mass of<br>solvent | mass of<br>paper | mass of<br>paper+<br>undissolved<br>compound | mass of<br>undissolved | mass of<br>dissolved | volume of<br>solvent | solubility | solubility      | average<br>solubility |
|------|---------|-----------------|-----------------------------|------------------------------------------|---------------------|--------------------|------------------|----------------------------------------------|------------------------|----------------------|----------------------|------------|-----------------|-----------------------|
| unit |         | (g)             | (g)                         | (g)                                      | (g)                 | (g)                | (g)              | (g)                                          | (g)                    | (g)                  | (mL)                 | (g/g)      | (mg/mL)         | (mg/mL)               |
|      | water   | 134.0770        | 141.3890                    | 142.9540                                 | 1.5650              | 7.3120             | 3.1980           | 3.2230                                       | 0.0250                 | 1.5400               | 7.3120               | 0.2106     | <b>210.61</b>   |                       |
|      |         | 142.2150        | 149.5630                    | 151.6610                                 | 2.0980              | 7.3480             | 3.2660           | 3.3110                                       | 0.0450                 | 2.0530               | 7.3480               | 0.2794     | <b>279.40</b>   |                       |
|      |         | 136.3670        | 144.7000                    | 145.6310                                 | 0.9310              | 8.3330             | 3.1900           | 3.2180                                       | 0.0280                 | 0.9030               | 8.3330               | 0.1084     | <b>excluded</b> | <b>245.00</b>         |

## 8. References

---

- <sup>1</sup> Bruker 2005, *APEX2*, Version 1.0-27. Bruker AXS Inc., Madison, Wisconsin, USA
- <sup>2</sup> Bruker 2004, *SAINT-Plus* (including *XPREP*), Version 7.12. Bruker AXS Inc., Madison, Wisconsin
- <sup>3</sup> Bruker 2003, *XPREP2*, Version 6.14. Bruker AXS Inc., Madison, Wisconsin, USA
- <sup>4</sup> G. M. Sheldrick, *SHELXS-97* and *SHELXL-97* programs for crystal structure determination and refinement, 1997, University of Gottingen, Germany. *SHELXL-2016/4* version was used in the final refinement steps.
- <sup>5</sup> L. J. Barbour, *J. Supramol. Chem.*, 2001, 1, 189-191
- <sup>6</sup> Mercury 3.8 - New Features for the Visualization and Investigation of Crystal Structures, C. F. Macrae, I. J. Bruno, J. A. Chisholm, P. R. Edgington, P. McCabe, E. Pidcock, L. Rodriguez-Monge, R. Taylor, J. van de Streek and P. A. Wood, *J. Appl. Cryst.*, 2008, **41**, 466-470
- <sup>7</sup> (a) M.J. Turner, S. Grabowsky, D. Jayatilaka, M.A. Spackman, Accurate and Efficient Model Energies for Exploring Intermolecular Interactions in Molecular Crystals, *J. Phys. Chem. Lett.*, 2014, 5, 4249-4255. (b) M. J. Turner, S. P. Thomas, M.W. Shi, D. Jayatilaka and M. A. Spackman, Energy frameworks: insights into interaction anisotropy and the mechanical properties of molecular crystals, *Chem. Commun.*, 2015, 51, 3735.
